# Supplementary material for: Genome-Wide Analysis and Functional Characterization of Pyruvate Kinase (PK) Gene Family Modulating Rice Yield and Quality
Source: MDPI journal article supplement (doi:10.3390/ijms232315357), 2022-12-05
Supplement: s1 [file s1]

## Supplementary Material

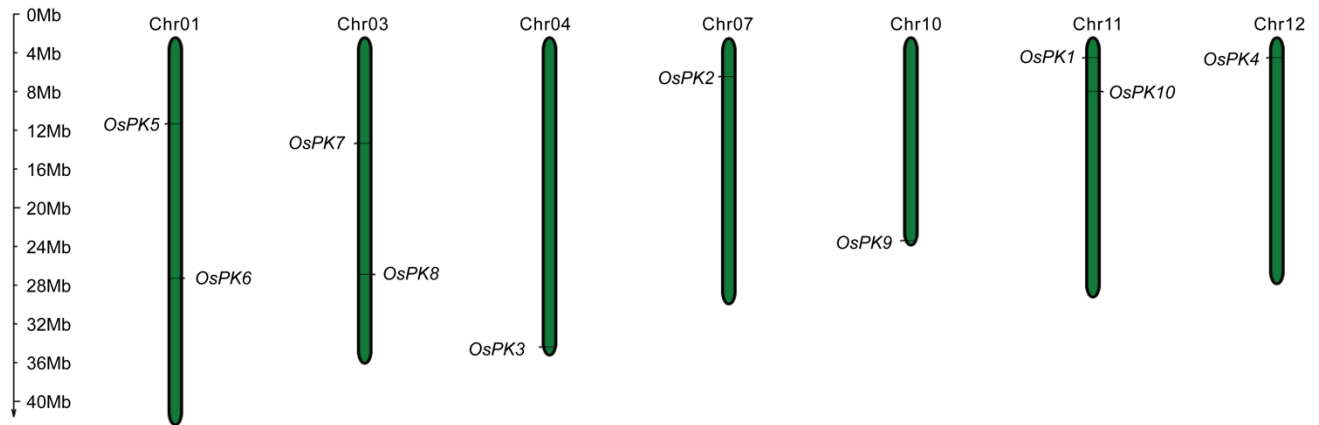

**Figure S1.** Chromosome localization analysis of PK genes in rice. The chromosome number is displayed at the top of each bar, and the size of the chromosome is indicated by its relative length. The unit on the left scale is Mb, and the short line indicates the approximate location of the PK genes on the corresponding chromosome.

|           |     |                                                   |                                         |                                              |                       |     |
|-----------|-----|---------------------------------------------------|-----------------------------------------|----------------------------------------------|-----------------------|-----|
| OsPK5     | 1   | MAVMeEQ--EAGAGVMRR-----                           | -----                                   | RPKTKIVCTLGPASRSVEMIGRLLRAGMCVARFNFSHGSHEY   | 59                    |     |
| OsPK6     | 1   | MAQV-VAA-AGTAAAVAAVGRPL[ 6 ]                      | ADALRPAA[ 77 ]                          | RRRTKIVCTIGPSTNTKEMIWLKAEAGMNVARLNMSHGHDAS   | 154                   |     |
| OsPK7     | 1   | MAA-----AV-----                                   | -----                                   | RPTVKGSCSSGGHAGAGR-----GAGWAPRRRRRRRGDPRR    | 41                    |     |
| OsPK8     | 1   | MATS-AAAAASTLPYLVAAASSS[ 2 ]                      | -----AR[ 36 ]                           | -RKTKLVCTVGPAC--VGALPALARGGMGVARVNLCHGGRGW   | 101                   |     |
| OsPK3     | 1   | MANIdMGKILAGLENDLDA-----                          | -----                                   | VPKTKLVCTLGPASRSVPMLEKLLRAGMNVARFNFSHGTHEY   | 16                    |     |
| OsPK2     | 1   | MAAT-AAAA-HTLLHLAAPRKPS[ 2 ]                      | -PPLPPAT[ 68 ]                          | -RRTKLVCTVGPATCGADEALAVGGMNVARVNMCHGDREW     | 139                   |     |
| OsPK9     | 1   | MAAA-AAEIVGSAARMA-----                            | APAVRPA- [ 63 ]                         | RRRTKIVCTIGPSTNTREMIWKLAEETGMNVARVNMCHGDHQS  | 129                   |     |
| OsPK1     | 1   | MHST--NLLLEEFIRMASILEPS                           | KPSFFPAM                                | ---TKIVGTLGPKSRVADTISSCLKAGMSVARFDFSWGDAEY   | 68                    |     |
| OsPK10    | 1   | MQGA--NMLLDEPVRILTSLVTFV                          | KPKVFPSL                                | ---TKIVGTLGPNSSHSEVVIQECLETAGMAVARFDFSWMDASY | 68                    |     |
| OsPK4     | 1   | MHST--NLLLEEFIRMASILEPS                           | KPSFFPAM                                | ---TKIVGTLGPKSRSVDTISSCLKAGMSVARFDFSWGDAEY   | 68                    |     |
|           |     |                                                   |                                         |                                              |                       |     |
| OsPK5     | 60  | HQETLDNLRAMES--TGILCAVMLDTK-GPEIRTGFLKDGKPVQLKKQ  | QETVSTDYSIKGDDN-MISMSYKKLAVDLK          | 135                                          |                       |     |
| OsPK6     | 155 | HQKVIDLVEYNAQTKd-NVIAIMLDTK-GPEVRSGLDPQ--PIMLETGQ | EFTFTTIKRG-VGTET-CVSVNYDDFVNDVE         | 228                                          |                       |     |
| OsPK7     | 42  | GRSTRASSRRRRRPrSGYQSRVSRAEQVGEIRTDGFLKDGKPIQLKQ   | KEITITIDYSIKGDN-LISMSYHKLAIIDLK         | 120                                          |                       |     |
| OsPK8     | 102 | HRAVMREVRLNEEE--GFCVSLMVDTE-GSQLLVADHGGAASKEADG   | SEWLFSTKRTDESHFF-TMHVNFDFKSEDL          | 177                                          |                       |     |
| OsPK3     | 62  | HQETLDNLRQAMHN--TGVLCAVMLDTK-GPEIRTGFLKDGKPIKLTG  | QELTFTDYEIKGDN-MITMSYKKLPVDVK           | 137                                          |                       |     |
| OsPK2     | 140 | HRGVIRAVRRLNEEK--GFAVAVMMDTE-GSEIHMGDLGGAAAKAEDG  | EIWTFSVRSFEAPPErTIHVNYEGFAEDVR          | 216                                          |                       |     |
| OsPK9     | 130 | HQKVIDLVEYNAKNDGNVIAIMLDTK-GPEVRSGLDPQ--PIMLEEG   | QEFNFTIKRG-VSTKD-TVSVNYDDFINDVE         | 204                                          |                       |     |
| OsPK1     | 69  | HQETLENLKLAKST--KKLCAVMLDTV-GPELQVNVKSEA-AISLEAN  | GTVVLTDPDQGEASSE-LLPINFSGLAKALK         | 143                                          |                       |     |
| OsPK10    | 69  | HQETLNNLRKAAQNV--NKLCPVMLDTL-GPEIQVHNSTGG-PIELK   | AGNHVTITPDLKAPASSE-ILPIKFGGLAKAVK       | 143                                          |                       |     |
| OsPK4     | 69  | HQETLENLKLAKST--KKLCAVMLDTV-GPELQVNVKSEA-SISLEEN  | GTVILTDPDQGEASSQ-VLPINFAGGLAKAVK        | 143                                          |                       |     |
|           |     |                                                   |                                         |                                              |                       |     |
| OsPK5     | 136 | PGSVILCADGTIT                                     | LTVLHCDKEqgLVRCRCENTAML-GERKNVNL        | GVIV                                         | DLPTLTEKDKEDILKWGPVNK | 205 |
| OsPK6     | 229 | VGDMLLVDDGMMMS                                    | LLVKSXTED--SVKCEVIDGGEL-KSRRLNVR        | GKSA                                         | TLPSITDKDWDIDK-FGVENQ | 195 |
| OsPK7     | 121 | PGSTILCADGTIT                                     | LTVLSCDCEqgLVRCRCENSAML-GERKNVNL        | GVIV                                         | DLPTLTEKDKVDILQWGPVNK | 190 |
| OsPK8     | 178 | VGDELVDGGMAR                                      | FEVIEKVG--DLRCKCTDPGLL--LPRAKLS[ 4 ]    | GKLV[ 4 ]                                    | GLPTLSAKDWADIE-FGIAEG | 250 |
| OsPK3     | 138 | PGNVILCADGTIS                                     | LTVLSCDPCagTVRCRCENTAML-GERKCNLP        | GIVV                                         | DLPTLTEKDKEDILKWGPVND | 207 |
| OsPK2     | 217 | VGDELVDGGMAR                                      | FEVVEKLG--DVKCRCTDPGLL--LPRANLT[ 4 ]    | GSIV[ 5 ]                                    | MLPTISSKDWLID-FGISeg  | 290 |
| OsPK9     | 205 | VGDILLVDGMMMS                                     | LAVKSKTAD--TVKCEVDDGEL-KSRRLNVR         | GKSA                                         | TLPSITEKDWEDIK-FGVENG | 271 |
| OsPK1     | 144 | PGATIFVQGYLFT[ 8 ]                                | LEVSEVKG--DVVCIKNSATaGSLFTLHCS          | QIHI                                         | DLPTLSDDEKVEIRRWGAPNK | 220 |
| OsPK10    | 144 | KGDTLFGQYLYFT[ 8 ]                                | LEVVEVTSGE--NVECLVTNTATLaGPMFTLHVS      | KAHV                                         | SLPTLSDYDKEVISTWGLHNS | 220 |
| OsPK4     | 144 | PGDTIFVQGYLYFT[ 8 ]                               | LEVSIQIKGD--DVVCIKNTATLaGSLFTLHCS       | QIHI                                         | DLPTLSDDEKVEIRKWGAPNK | 220 |
| Pfam:PK   |     |                                                   |                                         |                                              |                       |     |
| OsPK5     | 206 | IDMIALSFVRKGSDLVEVRKVL--GKHA--KSIMLSKVENEQ        | EGVANFDDILAQSDAFMVARGDLGMEIPIEKIFYAQKV  | 281                                          |                       |     |
| OsPK6     | 296 | VDYYAVSFVKDAQVVEHLKDYL--RSSN--ADIHVIVKIES         | ADSIPLNLSIITASDGMVARGDLGAELPIEEVLLQEE   | 371                                          |                       |     |
| OsPK7     | 191 | IDMIALSFVRKGSDLMLVRSVL--GEHA--KSILLMSKVENEQ       | EGVANVDEIIANSDAFMVARGDLGMEIPIEKIFYAQKV  | 266                                          |                       |     |
| OsPK8     | 251 | VDICALSFVKDANDIKYLTXYL--SRKS-LEHIKIFAKVESLES      | LNKLDIEASDGMVARGDLGVQIPLEQIPAIQEA       | 327                                          |                       |     |
| OsPK3     | 208 | IDMIALSFVRKGSDLTVVRQLL--GQHA--KRILKMSKVENEQ       | EGVNFDEILRETDAFMVARGDLGMEIPIEKIFYAQKV   | 283                                          |                       |     |
| OsPK2     | 291 | VDFAVSFVKSAEIVNHLKSYIaaRSRG--SDIAVIAKIES          | IDSLNLEEIRASDGMVARGDMGAQIPLEQVPSVQK     | 368                                          |                       |     |
| OsPK9     | 272 | VDFYAVSFVKDAKVIHELKDYL--KSN--ADIHVIVKIES          | ADSIPLNLSIITASDGMVARGDLGAELPIEEVLLQEE   | 347                                          |                       |     |
| OsPK1     | 221 | IDFLSLSYTRHAEVDVQAREFL--SKLGLdSQTQIFAKIEN         | VEGLNFDEILQEADGIIILSGNLGIDLPEKVFLLFQKS  | 298                                          |                       |     |
| OsPK10    | 221 | VDIISLSYTRHAEVDVRLRSFL--QSHG-1QDTQIYAKVENTE       | GLDHDFDEILQEADGVIISRGDLGIDLPEKVFLLFQKS  | 297                                          |                       |     |
| OsPK4     | 221 | IDFLSLSYTRHAEVDVQAREFL--SKLGLdSQTQIFAKIEN         | VEGLNFDEILQEADGIIILSGNLGIDLPEKVFLLFQKS  | 298                                          |                       |     |
|           |     |                                                   |                                         |                                              |                       |     |
| OsPK5     | 282 | MIFKCNIGQKPVVTTATQMLESMIKSPRPTRAEATDVANAVLDG      | TCVMLSGETAAGAYPELAVRTMAKICLQAESCVDHA    | 361                                          |                       |     |
| OsPK6     | 372 | IIRMCRSMGKAVIVATNMLESIMVHPTPTRAEVSIDIAVREGS       | DGIMLSGETAHGKFLKAVKVMHTVALRTEATMSGG     | 451                                          |                       |     |
| OsPK7     | 267 | MIHKCNIGQKPVVTTATQMLESMIKSPCPTRAEATDVANAVLDG      | TCVMSGETAAGAYPELAVQTMANICSRAEYLDYP      | 346                                          |                       |     |
| OsPK8     | 328 | IVDLCRNLKPKVIVASQLESMEVYPTPTRAEADVSEAVRQYAD       | AVMLSAESAIGAYPQKALAVLRAASERMEWSRD       | 407                                          |                       |     |
| OsPK3     | 284 | MIYKCNLAGKPVVTTATQMLESMIKSPRPTRAEATDVANAVLDG      | TCVMLSGETAAGAYPELAVKIMARICVEAESLNE      | 363                                          |                       |     |
| OsPK2     | 369 | IVKLCRQNLKPKVIVASQLESMEYPTPTRAEADVSEAVRQYAD       | AVMLSGESAMGRYPEKALSLSVLSRISRIEKKWRE     | 448                                          |                       |     |
| OsPK9     | 348 | IVTRCRSMGKAVIVATNMLESIMHPTPTRAEVSIDIAVREGS        | DAIMLSGETAHGKFLKAVKVMHTVAQRTESWLYNP     | 427                                          |                       |     |
| OsPK1     | 299 | ALHKCNMAGKPAVV--TRVDSMTDNLRPTRAETDVANAVLDG        | SDAILLGAETLRGLYPVETISIVGKICAEAEKVFNQD   | 377                                          |                       |     |
| OsPK10    | 298 | AIKKCNLAGKPVII--TRVDSMTDNLRPTRAETDVANAVLDG        | TDGILLGAETHRGYPVDVAVSTVGRICAEAESVYNQ    | 376                                          |                       |     |
| OsPK4     | 299 | ALHKCNMAGKPAVV--TRVDSMTDNLRPTRAETDVANAVLDG        | SDAILLGAETLRGLYPVETISIVGKICAEAEKVFNQD   | 377                                          |                       |     |
|           |     |                                                   |                                         |                                              |                       |     |
| OsPK5     | 362 | AVFKSITASAPIPM                                    | SPLESASSAVRTANSAKAALILVLT               | TRGGTARLVAKYRPSMPILSVVVP                     | PELKqTDSFDWTC         | 438 |
| OsPK6     | 452 | ETPANL-----[ 6 ]                                  | HMSMFAYHSTMSNTLG-TSIVV                  | TRTGFMALLSHYRPSGTIFAFTDQ                     | -----                 | 512 |
| OsPK7     | 347 | FIFKKLSSAPVPL                                     | SPLESASSAVQTANISKASLILVLT               | TRGGTARLVAKYRPSMPILSVVVP                     | PELKqTDSFDWTC         | 423 |
| OsPK8     | 408 | NMQKLLPQHQAIA[ 3 ]                                | RISEQICTSAEMANNLAVDAIFVYTKYGHMA         | LLSRNRPPIFAFTDN                              | -----                 | 474 |
| OsPK3     | 364 | AVFKEMIRSAPLPM                                    | SPLESASSAVRTANSAKAALILVLT               | TRGGTARLVAKYRPSMPILSVVVP                     | PELKqTDSFDWTC         | 439 |
| OsPK2     | 449 | KRHEELKDVSSS[ 3 ]                                 | KISEEICISAAKMANKLEVDVAVVTNT             | GHMASSLLSRCRPPCIFAFTTS                       | -----                 | 515 |
| OsPK9     | 428 | TTSFSLVAHPQALL[ 7 ]                               | QLSKMFGSHATMMANTLC-TPII                 | VTRTGSMALLSHYRPSSTIFAFTNE                    | -----                 | 497 |
| OsPK1     | 378 | LYFKRTVKYVGEPM                                    | THLESIASSAVRAAIKVKASVICTSS              | GRAARLIAKYRPTMPVLSVVIP                       | RLK-TNQLRWSFT         | 453 |
| OsPK10    | 377 | VHFKLVLKHVGDPM                                    | PHEESVASSAVRTAMKVKAAIVVFTFS             | GRAARLIAKYRPTMPVLSVVIP                       | REG-SDPTKWSY          | 452 |
| OsPK4     | 378 | LYFKRTVKHVGEPM                                    | THLESIASSAVRAAIKVKASVICTSS              | GRAARLIAKYRPTMPVLSVVIP                       | RLK-TNQLRWSFT         | 453 |
| Pfam:PK_C |     |                                                   |                                         |                                              |                       |     |
| OsPK5     | 439 | DEAPARHSLIVRGVIMPLSAATAKAFDNEA-TEEALGFAISNAK      | AGLNSGESVVALH                           | RIGTASVIKLLTAN--                             | 510                   |     |
| OsPK6     | 513 | -ERVQRRLALYQGVCPVQME-----                         | FSDDA--EKTFGDALSYLLKHGMVKEGEEVALVQ[ 9 ] | QSTHNIQVRKV----                              | 583                   |     |
| OsPK7     | 424 | DEAPARQS-----                                     | HCQGFDPNA-----EHRYTKGI-----             | 448                                          |                       |     |
| OsPK8     | 475 | -ANSRSMNLYWGVIPQLPL-----                          | LSNNM--EDNFNQTIKLMKSGSVKSGD             | TVLVVA[ 9 ]                                  | ATSVFQSIQVRIVD--      | 548 |
| OsPK3     | 440 | SEGPARHSLIVRGLVPLLAEGSAKATDS                      | ES-TEVILDAALKSAVQKQLCKPGDAVVALH         | RIGVASVIKICIVK--                             | 511                   |     |
| OsPK2     | 516 | -TSVRRRLNLQGLIFPRLS-----                          | FSDDM--ESNLNRTEFSLKARGMIQSGDLVIALS[ 1 ] | ---MLQSIQVMNV--                              | 578                   |     |
| OsPK9     | 498 | -ERVQRRLALYQGVVPIYMK-----                         | FSDDA--EETFSRAISSLLNAQFVKEG             | DVYTLVQ[ 9 ]                                 | ESTHHIQVRKVQG--       | 570 |
| OsPK1     | 454 | GAFAERQSLIVRGLFPLADPRHPAEST                       | NAENESVLKVALDHGKASGVIKSHDRVVVCQ         | KVGDSVVVKIIELDd-                             | 527                   |     |
| OsPK10    | 453 | GTTQARQCFARGVYPLMASTEEAETGGLT                     | rEYGIKLAQNYGRSVGMQLPYDRLIIFQ            | KIGDSSVVVKIIECDss                            | 527                   |     |
| OsPK4     | 454 | GAFAERQSLIVRGLFPLADPRHPAEST                       | NAENESVLKVALDHGKASGVIKSHDRVVVCQ         | KVGDSVVVKIIELDd-                             | 527                   |     |

**Figure S2.** Multiple sequence alignment among PKs in rice. Constraint-based Multiple Alignment Tool was used for the multiple sequence alignment. The red color indicates highly conserved columns and blue indicates less conserved ones. The long black line represents the Pfam:PK domain and the black wavy line represents the Pfam:PK\_C domain.

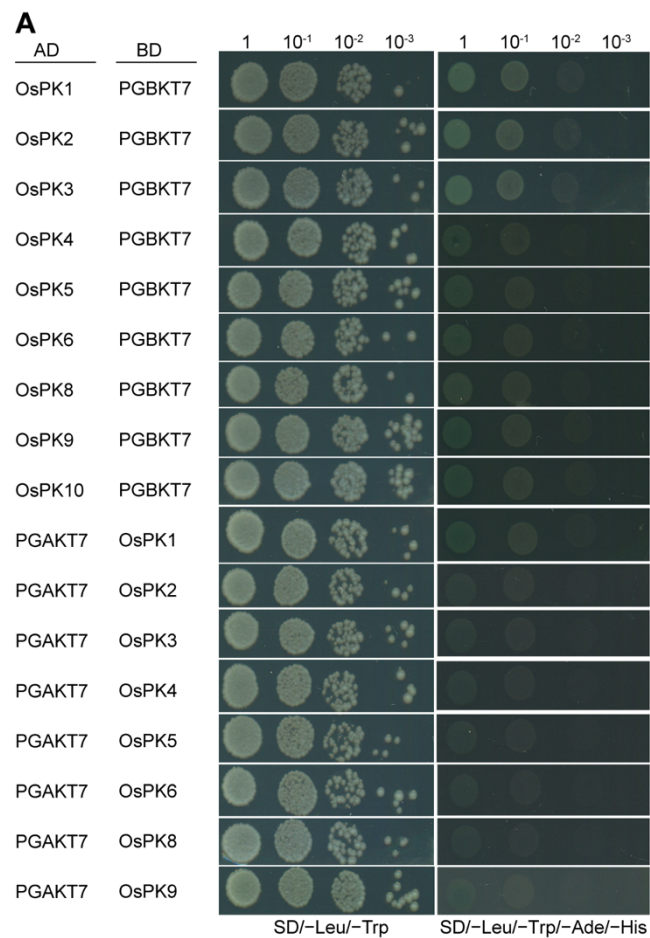

**Figure S3.** Interaction among PKs in rice. Y2H assay was used to detect interaction among PKs. Follow the concentration gradient of one-tenth on the non-selective pressure medium (SD/-Leu/-Trp) and the selective medium (SD/-Leu/-Trp/-Ade/-His) for dot observation. The interaction between T (pGADT7-T) and 53 (pGBKT7-53) was used as a positive control. And pGADT7, pGBKT7 were used as negative control.

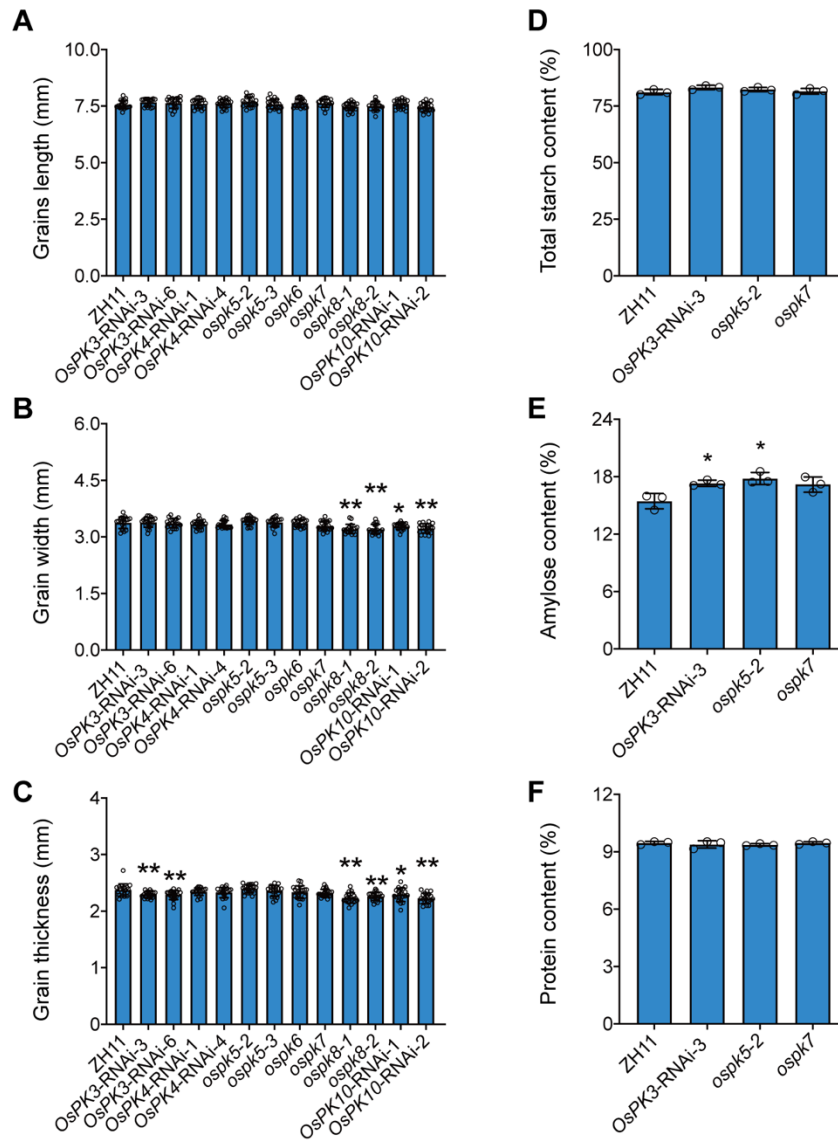

**Figure S4.** Yield-related traits and grain quality of ZH11, CRISPR/Cas9-based mutants, and RNAi-based material of PK genes in rice. **(A-C)** Grain length, grain width, and grain thickness of ZH11, the CRISPR/Cas9-based mutants, and RNAi material.  $n=20$ . Error bars indicate the mean  $\pm$  SD. **(D-F)** Total starch content, amylose content, and protein content of WT and mutants and RNAi lines seeds. Error bars indicate the mean  $\pm$  SD of three individual replicates. Asterisks indicate statistical significance between the WT and the CRISPR/Cas9-based mutants or RNAi-based materials, as determined by a Student's  $t$ -test (\* $P<0.05$ ; \*\* $P<0.01$ ).

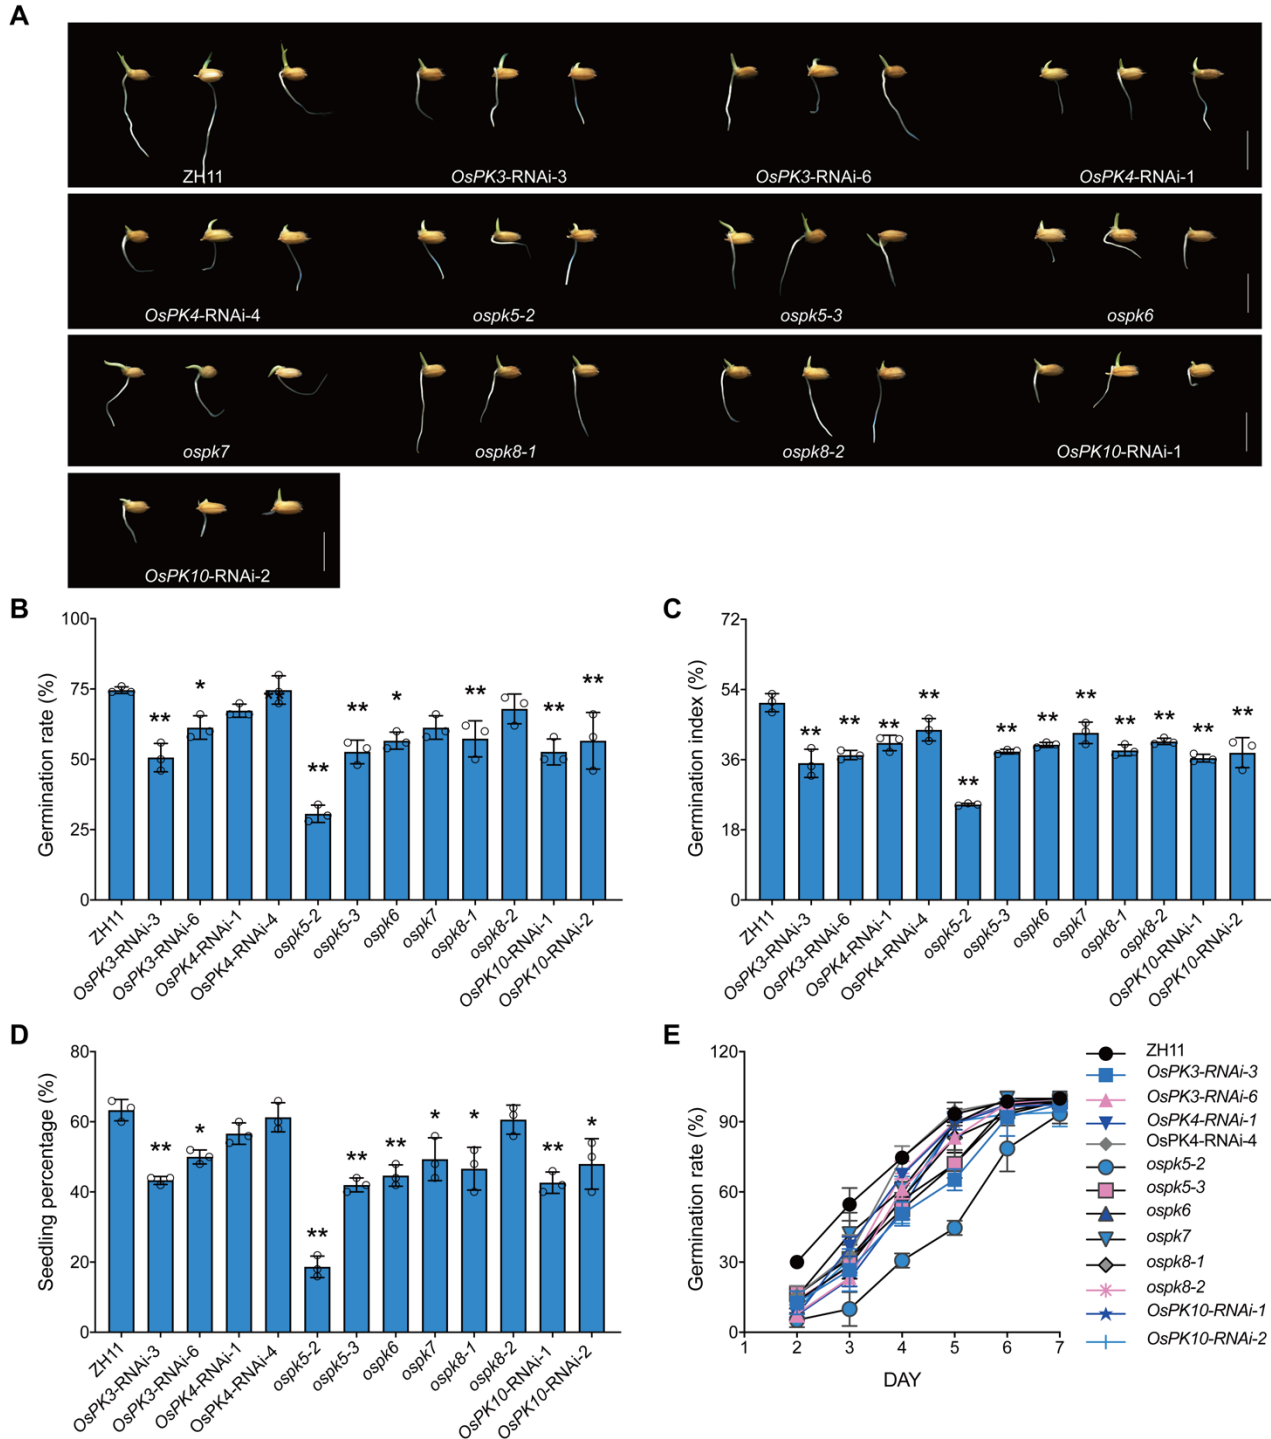

**Figure S5.** Seed germination of mutant and RNAi material of PK genes in rice. **(A)** Seed germination of CRISPR mutants, RNAi lines, and WT after 4 days of imbibition. Comparison of dynamic seed germination phenotype **(B)**, germination rates **(C)**, germination indexes, **(D)** and seedling percentages **(E)** between mutants, RNAi lines, and WT at 4 days after imbibition. Error bars indicate the mean  $\pm$  SD of three individual replicates. Asterisks indicate statistical significance between the WT and the mutant and RNAi material seeds, as determined by a Student's *t*-test (\* $P$  < 0.05; \*\* $P$  < 0.01). Bars = 1 cm. DAY represents days after imbibition.

**Table S1.** Identification, protein physical and biochemical characteristics analysis of PKs in rice

| Name          | Locus Name     | Genomic length(bp) | Length of CDS (bp) | Amino acids (aa) | Molecular Weight (KD) | Isoelectric Point | GRAVY  | Instability index | Aliphatic index |
|---------------|----------------|--------------------|--------------------|------------------|-----------------------|-------------------|--------|-------------------|-----------------|
| <i>OsPK1</i>  | LOC_Os11g05110 | 4395               | 1584               | 527              | 57.32                 | 6.3               | 0.025  | 30.9              | 100.09          |
| <i>OsPK2</i>  | LOC_Os07g08340 | 4639               | 1737               | 578              | 62.87                 | 5.92              | -0.09  | 44.06             | 91.35           |
| <i>OsPK3</i>  | LOC_Os04g58110 | 3934               | 1536               | 511              | 55.23                 | 8.25              | 0.032  | 31.61             | 99.78           |
| <i>OsPK4</i>  | LOC_Os12g05110 | 4515               | 1584               | 528              | 57.44                 | 6.3               | 0.004  | 29.58             | 100.06          |
| <i>OsPK5</i>  | LOC_Os01g16960 | 5791               | 1533               | 510              | 54.905                | 8.14              | 0.047  | 33.3              | 94.31           |
| <i>OsPK6</i>  | LOC_Os01g47080 | 7340               | 1752               | 583              | 63.25                 | 6.01              | -0.143 | 38.33             | 87.14           |
| <i>OsPK7</i>  | LOC_Os03g20880 | 3479               | 1347               | 448              | 48.66                 | 9.19              | -0.194 | 48.51             | 86.67           |
| <i>OsPK8</i>  | LOC_Os03g46910 | 4097               | 1647               | 548              | 59.68                 | 6.08              | -0.065 | 35.29             | 93.5            |
| <i>OsPK9</i>  | LOC_Os10g42100 | 5870               | 1713               | 570              | 61.65                 | 6.01              | -0.159 | 42.13             | 87.12           |
| <i>OsPK10</i> | LOC_Os11g10980 | 6539               | 1584               | 527              | 57.17                 | 5.91              | -0.082 | 35.7              | 92.66           |

**Table S2.** Primer used in this study

| Primer name  | Sequence                              |
|--------------|---------------------------------------|
| OsPK1-RT-F   | ATTGCTGCCCATCAACTTCTC                 |
| OsPK1-RT-R   | CAGCCAGAGTAGCCGAATTT                  |
| OsPK2-RT-F   | CATGAGGAACTGGA ACTTAAA                |
| OsPK2-RT-R   | GACGAAAACGGCATCTAC                    |
| OsPK3-RT-F   | GCTCTGTCGTTTGTCCGTAA                  |
| OsPK3-RT-R   | TTTCAACCTTTGACATCAGCTT                |
| OsPK4-RT-F   | GAGGCCTCCTCACAAGTGC                   |
| OsPK4-RT-R   | CACCTGGCTTCACAGCCTTA                  |
| OsPK5-RT-F   | GTCATGCTCGACACCAAGG                   |
| OsPK5- RT-R  | TGACCCTTCTTCAACTGTACG                 |
| OsPK6-RT-F   | TGTTTCGTGGAAAGAGCG                    |
| OsPK6-RT-R   | AAAGAAACGGCATAGTAGTCA                 |
| OsPK8-RT-F   | TCCTCGAGCCAAACTGTCAT                  |
| OsPK8-RT-R   | GAGCGATGCAATCAACTCCT                  |
| OsPK9-RT-F   | GCAGTTCGTGAAGGTTCTGA                  |
| OsPK9-RT-R   | GGATTCTGTTCTCTGTGCCA                  |
| OsPK10-RT-F  | GGGCTCTGATCCAACAAAGT                  |
| OsPK10-RT-R  | CTCCTCAGTACTCGCCATCA                  |
| OsPK1-1132-F | CGGGCTGCAGGAATTCATGCATTGACGAATCTGCTGC |

|               |                                           |
|---------------|-------------------------------------------|
| OsPK1-1132-R  | CGGTATCGATAAGCTTATCGTCCAGCTCAATGATCTTC    |
| OsPK2-1132-F  | CGGGCTGCAGGAATTCATGGCCGCCACCGCCGCCGCGG    |
| OsPK2-1132-R  | CGGTATCGATAAGCTTAGGTACGTTTCATGACCTGGATG   |
| OsPK3-1132-F  | CGGGCTGCAGGAATTCATGGCGAACATCGACATGGGG     |
| OsPK3-1132-R  | CGGTATCGATAAGCTTCTTCACGATGCAGATCTTGAT     |
| OsPK4-1132-F  | CGGGCTGCAGGAATTCATGCATTTCGACGAATCTGCTG    |
| OsPK4-1132-R  | CGGTATCGATAAGCTTATCGTCCAGCTCAATGATCTTC    |
| OsPK5-1132-F  | CGGGCTGCAGGAATTCATGGCGGTGATGGAGGAGCAGC    |
| OsPK5-1132-R  | CGGTATCGATAAGCTTGTTTCGCTGTCAGGAGCTTGAT    |
| OsPK6-1132-F  | CGGGCTGCAGGAATTCATGGCGCAGGTGGTGGCTGCGG    |
| OsPK6-1132-R  | CGGTATCGATAAGCTTAACCTTCCTGACCTGAATATTA    |
| OsPK7-1132-F  | CGGGCTGCAGGAATTCATGGCCGCCGCGGTCAGGCCG     |
| OsPK7-1132-R  | CGGTATCGATAAGCTTAATGCCTTTGGTGTAGCGGTG     |
| OsPK8-1132-F  | CGGGCTGCAGGAATTCATGGCAACCTCCGCCGCCGCCG    |
| OsPK8-1132-R  | CGGTATCGATAAGCTTGTCCACTATTCGAACTTGAAT     |
| OsPK9-1132-F  | CGGGCTGCAGGAATTCATGGCGGCGGCGGCGGCTGAG     |
| OsPK9-1132-R  | CGGTATCGATAAGCTTGCCCTGGACTTTCCTCACTTGA    |
| OsPK10-1132-F | CGGGCTGCAGGAATTCATGCAGGGCGCCAACATGCTC     |
| OsPK10-1132-R | CGGTATCGATAAGCTTCGAACTGTCACACTCGATGAT     |
| OsPK1-AD-F    | GGAGGCCAGTGAATTCATGCATTTCGACGAATCTGCTGC   |
| OsPK1-AD-R    | CGAGCTCGATGGATCCCTAATCGTCCAGCTCAATGATCTTC |
| OsPK2-AD-F    | GGAGGCCAGTGAATTCATGGCCGCCACCGCCGCCGCGG    |



# Supplementary Material

|             |                                                |
|-------------|------------------------------------------------|
| OsPK2-AD-R  | CGAGCTCGATGGATCCTCAAGGTACGTTTCATGACCTGGATG     |
| OsPK3-AD-F  | GGAGGCCAGTGAATTCATGGCGAACATCGACATGGGG          |
| OsPK3-AD-R  | CGAGCTCGATGGATCCTTACTTCACGATGCAGATCTTGAT       |
| OsPK4-AD-F  | GGAGGCCAGTGAATTCATGCATTTCGACGAATCTGCTG         |
| OsPK4-AD-R  | CGAGCTCGATGGATCCCTAATCGTCCAGCTCAATGATCTTC      |
| OsPK5-AD-F  | GGAGGCCAGTGAATTCATGGCGGTGATGGAGGAGCAGC         |
| OsPK5-AD-R  | CGAGCTCGATGGATCCCTAGTTCGCTGTCAGGAGCTTGAT       |
| OsPK6-AD-F  | GGAGGCCAGTGAATTCATGGCGCAGGTGGTGGCTGCGG         |
| OsPK6-AD-R  | CGAGCTCGATGGATCCTCAAACCTTCCTGACCTGAATATTA      |
| OsPK8-AD-F  | GGAGGCCAGTGAATTCATGGCCGCCGCGGTCAGGCCG          |
| OsPK8-AD-R  | CGAGCTCGATGGATCCTCAAATGCCTTTGGTGTAGCGGTG       |
| OsPK9-AD-F  | GGAGGCCAGTGAATTCATGGCGGCGGCGGCGGCTGAG          |
| OsPK9-AD-R  | CGAGCTCGATGGATCCTTAGCCCTGGACTTTCCTCACTTGA      |
| OsPK10-AD-F | GGAGGCCAGTGAATTCATGCAGGGCGCCAACATGCTC          |
| OsPK10-AD-R | CGAGCTCGATGGATCCTTACGAACTGTCACACTCGATGAT       |
| OsPK1-BD-F  | CATGGAGGCCGAATTCATGCATTTCGACGAATCTGCTGC        |
| OsPK1-BD-R  | TAGTTATGCGGCCGCTGCAGCTAATCGTCCAGCTCAATGATCTTC  |
| OsPK2-BD-F  | CATGGAGGCCGAATTCATGGCCGCCACCGCCGCCGCGG         |
| OsPK2-BD-R  | TAGTTATGCGGCCGCTGCAGTCAAGGTACGTTTCATGACCTGGATG |
| OsPK3-BD-F  | CATGGAGGCCGAATTCATGGCGAACATCGACATGGGG          |
| OsPK3-BD-R  | TAGTTATGCGGCCGCTGCAGTTCCTTACGATGCAGATCTTGAT    |

|              |                                               |
|--------------|-----------------------------------------------|
| OsPK4-BD-F   | CATGGAGGCCGAATTCATGCATTCGACGAATCTGCTG         |
| OsPK4-BD-R   | TAGTTATGCGGCCGCTGCAGCTAATCGTCCAGCTCAATGATCTTC |
| OsPK5-BD-F   | CATGGAGGCCGAATTCATGGCGGTGATGGAGGAGCAGC        |
| OsPK5- BD-R  | TAGTTATGCGGCCGCTGCAGCTAGTTCGCTGTCAGGAGCTTGAT  |
| OsPK6-BD-F   | CATGGAGGCCGAATTCATGGCGCAGGTGGTGGCTGCGG        |
| OsPK6-BD-R   | TAGTTATGCGGCCGCTGCAGTCAAACCTTCCTGACCTGAATATTA |
| OsPK8-BD-F   | CATGGAGGCCGAATTCATGGCCGCCGCGGTCAGGCCG         |
| OsPK8-BD-R   | TAGTTATGCGGCCGCTGCAGTCAAATGCCTTTGGTGTAGCGGTG  |
| OsPK9-BD-F   | CATGGAGGCCGAATTCATGGCGGCGGCGGCGGCTGAG         |
| OsPK9-BD-R   | TAGTTATGCGGCCGCTGCAGTTAGCCCTGGACTTTCCTCACTTGA |
| OsPK10-BD-F  | CATGGAGGCCGAATTCATGCAGGGCGCCAACATGCTC         |
| OsPK10-BD-R  | TAGTTATGCGGCCGCTGCAGTTACGAACTGTCACACTCGATGAT  |
| OsPK3Ri-K-F  | TTACTTCTGCACTAGGTACC GTACGCACAGCCAACAAGG      |
| OsPK3Ri-S-R  | CGTAGGGGCGATAGAGCTCGCAGAGCAACAACAGCATCA       |
| OsPK3Ri-P-F  | TGCTTTTGGTTTTTCTGCAGGCAGAGCAACAACAGCATCA      |
| OsPK3Ri-B-R  | GAATTCCCGGGGATCC GTACGCACAGCCAACAAGG          |
| OsPK4Ri-K-F  | TACTTCTGCACTAGGTACCCCATCTCCTCCTGCCTCAAG       |
| OsPK4Ri-S-R  | TAGGGGCGATAGAGCTCACACAGACCACATCATCTCCTT       |
| OsPK4Ri-P-F  | CTTTTGGTTTTTCTGCAGACACAGACCACATCATCTCCTT      |
| OsPK4Ri-B-R  | GAATTCCCGGGGATCCCATCTCCTCCTGCCTCAAG           |
| OsPK10Ri-K-F | TTACTTCTGCACTAGGTACCTTGCTTGGTGCGGAGACT        |
| OsPK10Ri-S-R | CGTAGGGGCGATAGAGCTCATTGCCTTGCTGAGTTGTG        |
| OsPK10Ri-P-F | TGCTTTTGGTTTTTCTGCAGATTGCCTTGCTGAGTTGTG       |
| OsPK10Ri-B-R | GAATTCCCGGGGATCCTTGCTTGGTGCGGAGACT            |
